# Supplementary material
Source: publisher figshare collection journal article supplement (https://gsapubs.figshare.com/articles/dataset/_/12532226)
Supplement: Supplementary file 1 [file 1]

# Rapid exhumation in the Western Alps driven by Slab Detachment and Glacial Erosion

## Inverse Approach

Our method to convert thermochronometric ages to exhumation rates combines a thermal model, to predict temperature, with a closure temperature calculation for each thermochronometric system (Fox et al., 2014). A thermal model is used to predict temperature in space and time, as well as a material-point cooling rate, from which we calculate the characteristic closure temperature and its depth. The exhumation rate or, equivalently, the surface erosion rate at this point in space is a function of time,  $\dot{e}(t)$  and is related to the age,  $t$ , through a travel-time expression,

$$\int_0^t \dot{e}(t) dt = z_c \quad (1)$$

We parameterize exhumation rate at a single point in space as a piecewise constant function in time over a set of specified time intervals, and given the depth to the closure temperature, each age can be expressed as a linear equation. A suite of  $M$  ages can be expressed as a system of linear, independent, equations:

$$A\dot{e} = z_c \quad (2)$$

where  $z_c$  is a vector of length  $M$ ,  $\dot{e}$  is a vector of unknown exhumation rates, whose length is the product of the number of data and the number of time intervals, and  $A$  is a

sparse matrix whose components are simply the time interval lengths that sum to the measured age. In general each age is obtained at an independent location in space and, as we regard exhumation rate as variable in space, each row in Equation 2 is an independent equation. To be solvable, these independent equations must be coupled. We do so by requiring that exhumation rate be correlated in space for a given time interval. This can be imposed by defining an *a priori* covariance matrix for the exhumation rate vector and obtaining the maximum likelihood solution (Tarantola, 2005). The covariance matrix for each time interval is constructed using the separation distance between the *i*th and *j*th data,  $d_{ij}$ , and an exponential correlation function,

$$C_{ij} = S_e^2 \exp(-d_{ij}/l) \quad (3)$$

where  $l$  is a specified correlation length. We also specify an *a priori* variance for the exhumation rate,  $S_e^2$ , but its primary influence is as a weighting factor for the data uncertainty. It is assumed that exhumation rate is not correlated in time, so there is an independent matrix of form (3) for each time interval. These can be combined into a global matrix, setting cross-terms to zero. The maximum likelihood estimate for the exhumation rate is then (30):

$$\dot{e} = \dot{e}_{pr} + CA^T (ACA^T + C_e)^{-1} (z_c - A\dot{e}_{pr}) \quad (4)$$

where  $\dot{e}_{pr}$  is the *a priori* expected value of the exhumation rate, used to reduce the model to a zero expected value, and  $C_e$  is a diagonal matrix containing the estimated data uncertainty which we obtain from the analytical errors in the measurements. The depth to a closure isotherm is calculated from a one dimensional finite difference solution to the advection-diffusion equation for heat transfer to an isothermal boundary at the Earth's surface. Closure depth is evaluated at the time corresponding to the age

of the sample and takes into account the cooling-rate dependence of closure temperature. Although the thermal calculation is done only in the depth dimension, we correct the solution to take into account the perturbation of the closure isotherm due to topography using a spectral method (Fox et al., 2014). The thermal model is calibrated to the measured present day surface heat flux (Bodmer and Rybach, 1984), although we recognize that there is large uncertainty in these data and so investigate the sensitivity of our results to surface heat flow. The temperature solution depends on the exhumation rate, so the problem is non-linear and we obtain the solution by direct iteration; convergence typically occurs in less than ten iterations. We also calculate a parameter resolution matrix as (Tarantola, 2005)

$$R = CA^T (ACA^T + C_e)^{-1} A \quad (5)$$

The resolution matrix relates an exhumation rate to all other exhumation rates in space and time, so that for perfectly resolved parameters  $R$  is equal to the identity matrix. To simplify presentation, we integrate the resolution matrix across the spatial dimension. This thus ignores spread in space, but provides a measure of how well the exhumation rate at a single point is resolved in a particular time interval. A resolution value of 1.0 indicates perfect resolution; lower values indicate spread or averaging between time intervals (Fig. 3).

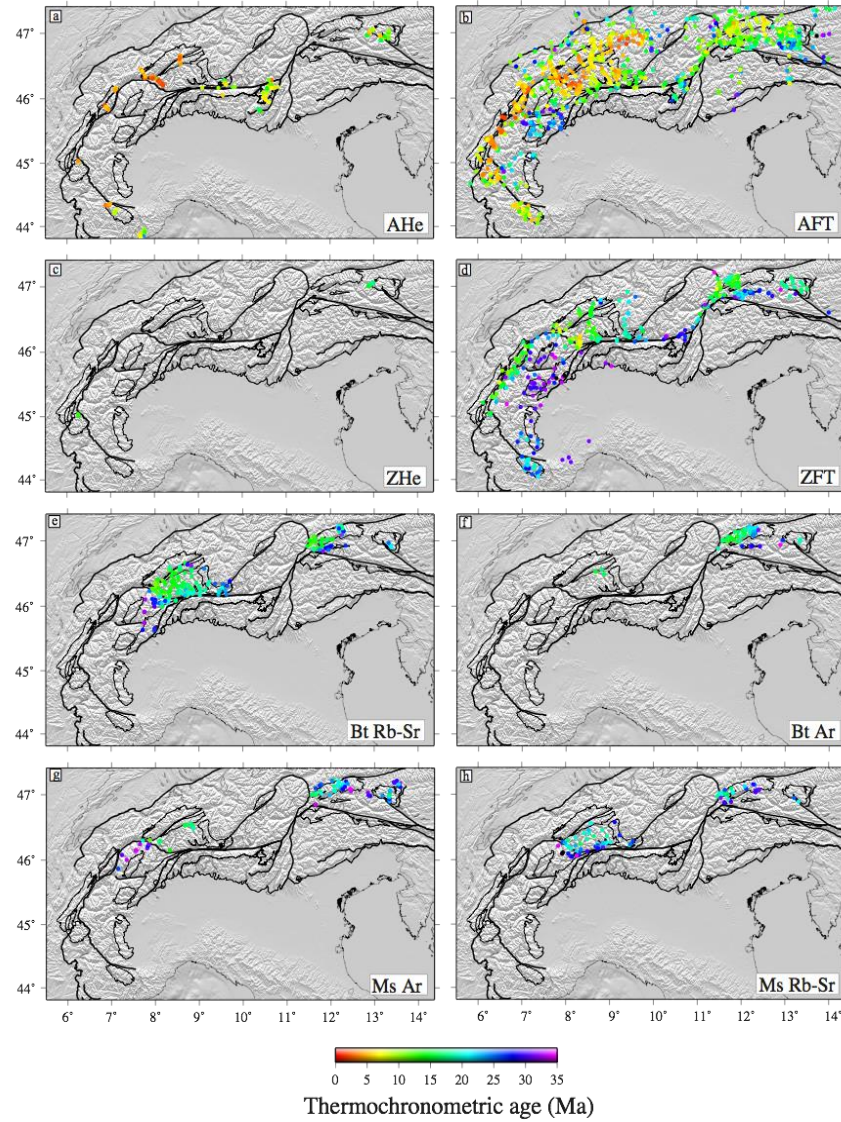

Figure DR1: Thermochronometric ages from the Alps used in our analysis. Ages that have been interpreted as that were not considered (due to fluid flow or poor reproducibility) in the original manuscripts are not included. Each plot shows ages for a specific mineral system. (a) Apatite (U-Th)/He, (b) apatite fission track ages, (c) zircon (U-Th)/He, (d) zircon fission track ages, (e) Rb-Sr in biotite, (f)  $^{39}\text{Ar}$ – $^{40}\text{Ar}$  and K/Ar in biotite, (g)  $^{39}\text{Ar}$ – $^{40}\text{Ar}$  and K/Ar in biotite, and (h) Rb-Sr in muscovite. Sources are referenced below.

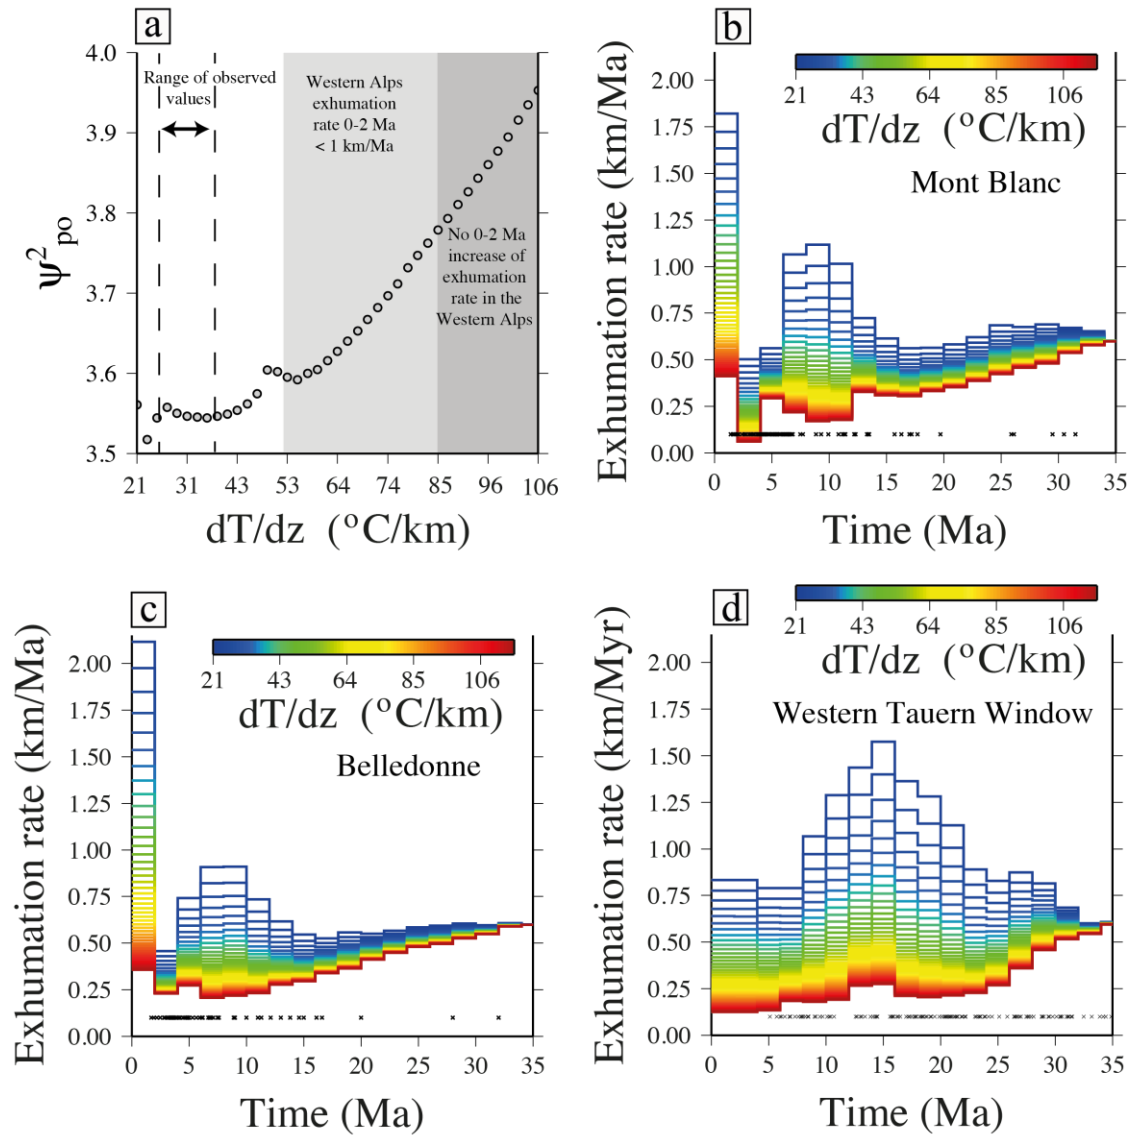

Figure DR2: Sensitivity of exhumation rate to modeled geothermal gradient. In all models, the initial, imposed geothermal gradient increases towards the present day in response to exhumation-driven advection. Although we specify initial gradient, we present results in terms of final gradient for comparison to observations. (a) A norm of the misfit between measured ages and predicted ages,  $\psi^2_{po}$ , for inversion results as a function of the predicted present day surface geothermal gradient using the prior exhumation rate, which is characteristic of the average over the study area. Observed gradients (Bodmer and Rybach, 1984) are in the range of 22  $^{\circ}\text{C}/\text{km}$  to 35  $^{\circ}\text{C}/\text{km}$ , but are notoriously poorly determined in mountainous terrain such as the Alps. Our best fit to the observed ages is found in the range of the observations, or even lower. High exhumation rates in last time interval persist for all models, but are not significant once

geothermal gradients are over 85 °C/km. Example exhumation histories are given for (b) Mont Blanc region and (c) Belledonne massif. Note large increase in exhumation rate in last time step for geothermal gradients in range of observation, but only a small increase if geothermal gradients are two to three times higher than estimated from borehole and tunnel temperatures.

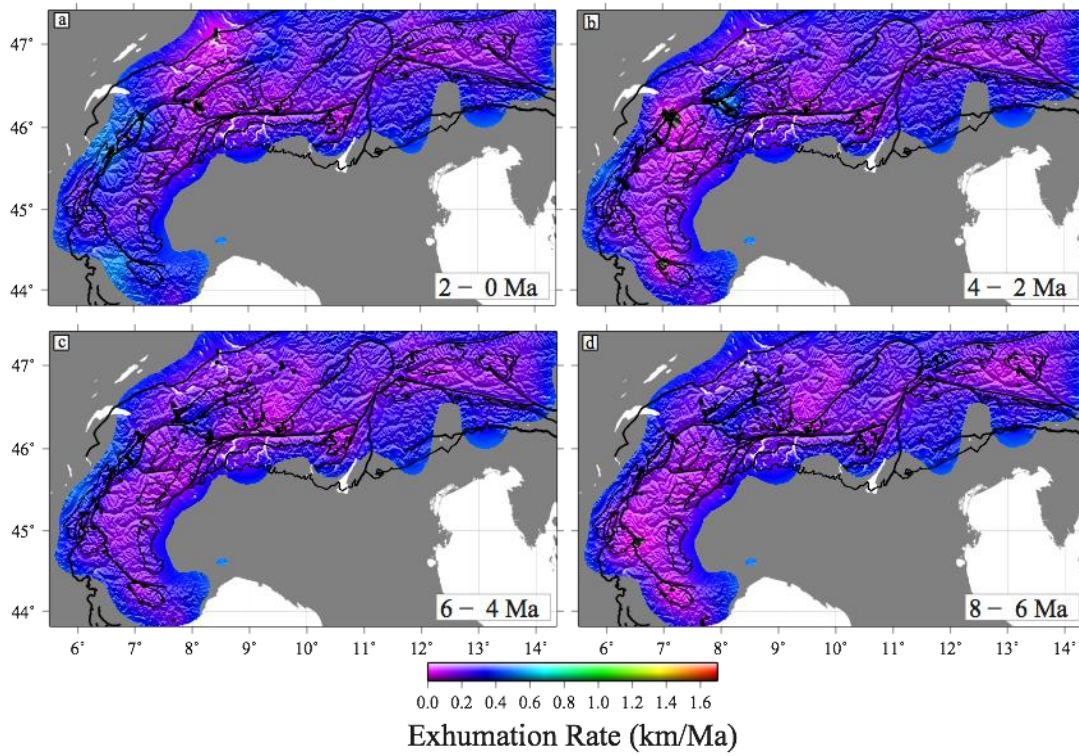

Figure DR3: Extreme geothermal gradient model. Spatial and temporal distribution of exhumation rate for an inversion with a thermal model that predicts a present day geothermal gradient of 100 °C/km. There is little to no increase in exhumation rate from 2 Ma to present in the Western Alps. However, exhumation rates are everywhere very low compared to other studies and this predicted geothermal gradient is much higher than observations, so we suggest that this model is unlikely to represent reality.

| Parameter                                | Parameter symbol      | Value | Units                            |
|------------------------------------------|-----------------------|-------|----------------------------------|
| <i>Thermal model parameters</i>          |                       |       |                                  |
| Elevation of upper boundary              | $z_0$                 | 1475  | m.a.s.l                          |
| Temperature of upper boundary            | $T_0$                 | 4     | °C                               |
| Basal heat flux                          | $q_b$                 | 40    | mW m <sup>-2</sup>               |
| Thermal diffusivity                      | $\kappa$              | 35    | km <sup>2</sup> /Myr             |
| Thermal conductivity                     | $k_b$                 | 2.6   | Wm <sup>-1</sup> K <sup>-1</sup> |
| Model thickness                          | $l$                   | 90    | km                               |
| Onset of exhumation                      | $t^*$                 | 34    | Ma                               |
| Exhumation rate                          | $\dot{\epsilon}_{pr}$ | 0.6   | km/Myr                           |
| <i>Inversion parameters</i>              |                       |       |                                  |
| Prior exhumation rate                    | $\dot{\epsilon}_{pr}$ | 0.6   | km/Myr                           |
| Prior exhumation rate standard deviation | $\sigma_{pr}$         | 0.1   | km/Myr                           |
| Time interval length                     | $\Delta T$            | 2     | Myr                              |
| Correlation length scale parameter       | $xL$                  | 25    | km                               |

Table DR1. Parameters used in the analysis. Thermal model parameters used to calculate closure depths and the parameters required for the inversion method described in detail in Fox et al., 2014.

Movie S1. Results of the inversion for time steps of 2 Myr. The exhumation rate function we recover is highly variable in space and through time. We are only able to resolve such a complex exhumation function due to the exceptional quantity of thermochronometric data.



## References Cited

- Bodmer, H.P., and Rybach, L., 1984, Geothermal map of Switzerland: heat flow density: Contributions to the Geology of Switzerland, Geophysics Series, v. 22.
- Fox, M., Herman, F., Willett, S.D., and May, D.A., 2014, A linear inversion method to infer exhumation rates in space and time from thermochronometric data: Earth Surface Dynamics, v. 2, no. 1, p. 47–65, 10.5194/esurf-2-47-2014, URL <http://www.earth-surf-dynam.net/2/47/2014/>.
- Tarantola, A., 2005, Inverse problem theory and methods for model parameter estimation: Society for Industrial Mathematics.

## Data Sources

- Allaz, J. Metamorphic Evolution in the Northern Central Alps: Linking  $^{39}\text{Ar}$ – $^{40}\text{Ar}$  Dating with Thermobarometry. Ph.D. thesis, nat. Univ. Bern (2008).
- Armstrong, R., Jager, E. & Eberhardt, P. A comparison of K-Ar and Rb-Sr ages on Alpine biotites. *Earth and Planetary Science Letters* **1**, 13–19 (1966).
- Bigot-Cormier, F. *La surrection du massif cristallin externe de l'Argentera (France-Italie) et ses relations avec la dformation plioclne de la marge nord-Ligure: arguments thermochronologiques (traces de fission), gomorphologiques et interprtations de sismique marine*. Ph.D. thesis, University of Nice, France, 352 pp (2002).
- Bistacchi, A., Dal Piaz, G., Massironi, M., Zattin, M. & Balestrieri, M. The Aosta-Ranzola extensional fault system and Oligocene-Present evolution of the Austroalpine-Penninic wedge in the northwestern Alps. *International Journal of Earth Sciences* **90**, 654–667 (2001).
- Brügel, A., Dunkl, I., Frisch, W., Kuhlemann, J. & Balogh, K. Geochemistry and geochronology of gneiss pebbles from foreland molasse conglomerates: geodynamic and paleogeographic implications for the Oligo-Miocene evolution of the Eastern Alps. *The Journal of geology* 543–563 (2003).
- Bürgi, A. & Klötzli, U. New data on the evolutionary history of the Ivrea Zone (Northern Italy). *Bulletin der Vereinigung Schweizerischer Petroleum-Geologen und-Ingenieure* **56**, 49–70 (1990).
- Carpéna, J. Fission track dating of zircon: zircons from Mont Blanc granite (French-Italian Alps). *The Journal of Geology* **100**, 411–421 (1992).

- Cederbom, C. E., Sinclair, H. D., Schlunegger, F. & Rahn, M. K. Climate-induced rebound and exhumation of the European Alps. *Geology* **32**, 709–713 (2004).
- Cederbom, C., van der Beek, P., Schlunegger, F., Sinclair, H. & Oncken, O. Rapid extensive erosion of the North Alpine foreland basin at 5–4 Ma. *Basin Research* **23**, 528–550 (2011).
- Ciancaleoni, L. *Deformation processes during the last stages of the continental collision: the brittle-ductile fault systems in the Bergell and Insubric areas (Eastern Central Alps, Switzerland-Italy)*. Ph.D. thesis, Université de Neuchâtel (2006).
- Coyle, D. *The application of apatite fission track analysis to problem in tectonics*. Ph.D. thesis, La Trobe University, Australia (1994).
- Dunkl, I. & Demény, A. Exhumation of the Rechnitz Window at the border of the Eastern Alps and Pannonian Basin during Neogene extension. *Tectonophysics* **272**, 197 – 211 (1997).
- Dunkl, I., Frisch, W. & Grundmann, G. Zircon fission track thermochronology of the southeastern part of the Tauern Window and the adjacent Austroalpine margin, Eastern Alps. *Eclogae Geologicae Helveticae* **96**, 209–218 (2003).
- Elias, J. The thermal history of the Ötztal-Stubai complex (Tyrol, Austria/Italy) in the light of the lateral extrusion model: Tübinger Geowissenschaftliche Arbeiten. *Reihe A* **36**, 172 (1998).
- Ferrara, G., Hirt, B., Jäger, E. & Niggli, E. Rb-Sr and U-Pb age determinations on the pegmatite of I Mondei. *Eclogae geol. Helv* **55**, 443–450 (1962).
- Flisch, M. Die Hebungsgeschichte der oberostalpinen Silvretta-Decke seit der mittleren Kreide. *Bull. Ver. Schweiz. Pet.-Geol. Ing* **53**, 23–49 (1986).
- Foeken, J. P. T., Dunai, T. J., Bertotti, G. & Andriessen, P. A. M. Late Miocene to present exhumation in the Ligurian Alps (southwest Alps) with evidence for accelerated denudation during the Messinian salinity crisis. *Geology* **31**, 797–801 (2003).
- Foeken, J. P. T., Persano, C., Stuart, F. M. & ter Voorde, M. Role of topography in isotherm perturbation: Apatite (U-Th)/He and fission track results from the Malta tunnel, Tauern Window, Austria. *Tectonics* **26**, C3006 (2007).
- Fügenschuh, B. & Zürich, E. T. H. *Thermal and kinematic history of the Brenner area (Eastern Alps, Tyrol)* (ETH, 1995).
- Fügenschuh, B., Loprieno, A., Ceriani, S. & Schmid, S. Structural analysis of the Subbriançonnais and Valais units in the area of Moûtiers (Savoy, Western Alps): paleogeographic and tectonic consequences. *International Journal of Earth Sciences* **88**, 201–218 (1999).
- Fügenschuh, B. & Schmid, S. Late stages of deformation and exhumation of an orogen constrained by fission-track data: A case study in the Western Alps. *Geological Society of America bulletin* **115**, 1425–1440 (2003).
- Giger, M. *Geochronologische und petrographische Studien an Geröllen und Sedimenten der Gonfolite Lombarda Gruppe (Südschweiz und Norditalien) und ihr Vergleich mit dem alpinen Hinterland*. Ph.D. thesis, University of Bern, Switzerland (1991).
- Glotsbach, C. *et al.* Neogene exhumation history of the Mont Blanc massif, western Alps. *Tectonics* **27**, TC4011 (2008).

- Glotzbach, C. *et al.* Thermal history of the central Gotthard and Aar massifs, European Alps: Evidence for steady state, long-term exhumation. *Journal of Geophysical Research* **115**, F03017 (2010).
- Grundmann, G. & Morteani, G. The young uplift and thermal history of the Central Eastern Alps (Austria/Italy), evidence from apatite fission track ages. *Jahrb. Geol. Bundesanst* **128**, 197–216 (1985).
- Hejl, E. & Grundmann, G. Apatit-spaltspurendaten zur thermischen geschichte der nördlichen kalkalpen, der flysch-und molassezone. *Jahrbuch der Geologischen Bundesanstalt, Vienna* **132**, 191–212 (1989).
- Hejl, E. ‘Cold spots’ during the Cenozoic evolution of the Eastern Alps: thermochronological interpretation of apatite fission-track data. *Tectonophysics* **272**, 159–173 (1997).
- Hetherington, C. & Villa, I. Barium silicates of the Berisal Complex, Switzerland: A study in geochronology and rare-gas release systematics. *Geochimica et cosmochimica acta* **71**, 3336–3347 (2007).
- Hunziker, J., Desmons, J. & Hurford, A. Thirty-two years of geochronological work in the Central and Western Alps: a review on seven maps, vol 13. *Mómoires de Géologie, Lausanne* (1992).
- Hunziker, J. & Bearth, P. Rb-Sr-Altersbestimmungen aus den Walliser Alpen. Biotitalterswerte und ihre Bedeutung für die Abkühlungsgeschichte der alpinen Metamorphose. *Eclogae. geol. Helv* **62**, 205–222 (1969).
- Hunziker, J. Polymetamorphism in the Monte Rosa, Western Alps. *Eclogae Geologicae Helvetiae* **63**, 151–161 (1970).
- Hurford, A., Hunziker, J. & Stöckhert, B. Constraints on the late thermotectonic evolution of the western Alps: evidence for episodic rapid uplift. *Tectonics* **10**, 758–769 (1991).
- Hurford, A. Cooling and uplift patterns in the Lepontine Alps South Central Switzerland and an age of vertical movement on the Insubric fault line. *Contributions to mineralogy and petrology* **92**, 413–427 (1986).
- Hurford, A. & Hunziker, J. Alpine cooling history of the Monte Mucrone eclogites (Sesia-Lanzo zone): fission track evidence. *Schweizerische Mineralogische und Petrographische Mitteilungen* **65**, 325–334 (1985).
- Hurford, A. & Hunziker, J. A revised thermal history for the Gran Paradiso massif. *Schweiz. Mineral. Petrogr. Mitt.* 319–329 (1989).
- Jäger, E. & Faul, H. Age measurements on some granites and gneisses from the Alps: *Geol. Soc. America Bull* **70**, 1553–1558 (1959).
- Keller, L. M., Abart, R., Schmid, S. M. & De Capitani, C. Phase relations and chemical composition of phengite and paragonite in pelitic schists during decompression: a case study from the Monte Rosa nappe and Camughera–Moncucco unit, Western Alps. *Journal of Petrology* **46**, 2145 (2005).
- Knaus, A. Apatit-Spaltspurendatierungen in Rätikon (Arosazone, Ostalpen) (1990).
- Lelarge, L. *Thermochronologie par la methode des traces de fission d’une marge passive (Dome de Ponta Grossa, SE Brsil) et au sein d’une cha’ine de collision (zone externe de l’arc alpin, France)*. Ph.D. thesis, University of Grenoble, France (1993).

- Leloup, P., Arnaud, N., Sobel, E. & Lacassin, R. Alpine thermal and structural evolution of the highest external crystalline massif: The Mont Blanc. *Tectonics* **24**, TC4002 (2005).
- Lihou, J., Hurford, A. & Carter, A. Preliminary fission-track ages on zircons and apatites from the Sardona unit, Glarus Alps, eastern Switzerland: late Miocene-Pliocene exhumation rates. *Schweizerische Mineralogische und Petrographische Mitteilungen* **75**, 177–186 (1995).
- Malusà, M. *et al.* Miocene to Present differential exhumation in the Western Alps: insights from fission track thermochronology. *Tectonics* **24**, TC3004 (2005).
- Martin, S., Bigazzi, G., Zattin, M., Viola, G. & Balestrieri, M. Neogene kinematics of the Giudicarie fault (Central-Eastern Alps, Italy): new apatite fission-track data. *Terra Nova* **10**, 217–221 (1998).
- Markley, M. *et al.* Alpine deformation and <sup>40</sup>Ar/<sup>39</sup>Ar geochronology of synkinematic white mica in the Siviez-Mischabel Nappe, western Pennine Alps, Switzerland. *Tectonics* **17**, 407–425 (1998).
- Michalski, I. & Soom, M. The Alpine thermo-tectonic evolution of the Aar and Gotthard massifs, central Switzerland: Fission track ages on zircon and apatite and K-Ar mica ages. *Schweizerische Mineralogische und Petrographische Mitteilungen* **70**, 373–387 (1990).
- Most, P. *Late Alpine cooling histories of tectonic blocks along the central part of the Transalp-Traversal (Inntal-Gadertal): constraints from geochronology*. Ph.D. thesis, University of Tübingen, Germany (2003).
- Pignatosa, A., Zattin, M., Massironi, M. & Cavazza, W. Thermochronological evidence for a late Pliocene climate-induced erosion rate increase in the Alps. *International Journal of Earth Sciences* **100**, 847–859 (2011).
- Purdy, J. & Jäger, E. K-Ar ages on rock-forming minerals from the Central Alps. *Mem. Inst. Geol. Min. Univ. Padova* **30**, 1–32 (1976).
- Rahn, M., Hurford, A. & Frey, M. Rotation and exhumation of a thrust plane: Apatite fission-track data from the Glarus thrust, Switzerland. *Geology* **25**, 599–602 (1997).
- Reinecker, J. *et al.* Tectonic control on the late stage exhumation of the Aar Massif (Switzerland): Constraints from apatite fission track and (U-Th)/He data. *Tectonics* **27**, TC6009 (2008).
- Romer, R., Schärer, U. & Steck, A. Alpine and pre-Alpine magmatism in the root-zone of the western Central Alps. *Contributions to mineralogy and petrology* **123**, 138–158 (1996).
- Sabil, N. *La datation par traces de fission: aspects méthodologiques et applications thermochronologiques en contextes alpins et de marge continentale*. Ph.D. thesis, University of Grenoble, France, 238 pp (1994).
- Sanchez, G. *et al.* Exhumation controlled by transcurrent tectonics: the Argentera-Mercantour massif (SW Alps). *Terra Nova* **23**, 116–126 (2011).
- Schaer, J., Reimer, G. & Wagner, G. Actual and ancient uplift rate in the Gotthard region, Swiss Alps: A comparison between precise levelling and fission-track apatite age. *Tectonophysics* **29**, 293–300 (1975).
- Schwartz, S. *La zone pimontaise des Alpes occidentales: un paléo-complexe de subduction. Arguments métamorphiques, géochronologiques et structuraux*. Ph.D. thesis, University of Lyon, France, 341 pp (2000).

- Seward, D. *et al.* Preliminary results of fission-track analyses in the southern Pelvoux area, SE France. *Memorie di Scienze Geologiche Padova* **51**, 25–31 (1999).
- Seward, D. & Mancktelow, N. Neogene kinematics of the central and western Alps: Evidence from fission-track dating. *Geology* **22**, 803–806 (1994).
- Soom, M. *Abkühlungs- und Hebungsgeschichte der Externmassive und der penninischen Decken beidseits der Simplon-Rhone-Linie seit dem Oligozän: Spaltspurdatering und Apatit/Zirkon und K-Ar-Datierungen an Biotit/Muskovit (westliche Zentralalpen)*. Ph.D. thesis, University of Bern, Switzerland, 64 pp (1990).
- Spiegel, C. *et al.* The erosion history of the Central Alps: evidence from zircon fission track data of the foreland basin sediments. *Terra Nova* **12**, 163–170 (2000).
- Staufenberg, H. Apatite fission-track evidence for postmetamorphic uplift and cooling history of the Eastern Tauern Window and the surrounding Austroalpine (Central Eastern Alps, Austria). *Jahrb. Geol. Bundesanst* **130**, 571–586 (1987).
- Steenken, A., Siegesmund, S., Heinrichs, T. & Fügenschuh, B. Cooling and exhumation of the Rieserferner Pluton (Eastern Alps, Italy/Austria). *International Journal of Earth Sciences* **91**, 799–817 (2002).
- Steiner, H. Mineralogisch-petrographische, geochemische und isotopengeologische Untersuchungen an einem Meta-Lamprophyr und seinem granodioritischen Nebengestein (Matorello-Gneis) aus der Maggia-Decke. *Schweizerische Mineralogische und Petrographische Mitteilungen* **64**, 227–259 (1984).
- Stockhert, B., Brix, M., Kleinschrodt, R., Hurford, A. & Wirth, R. Thermochronometry and microstructures of quartz—a comparison with experimental flow laws and predictions on the temperature of the brittle-plastic transition. *Journal of Structural Geology* **21**, 351–369 (1999).
- Timar-Geng, Z., Grujic, D. & Rahn, M. Deformation at the Leventina-Simano nappe boundary, Central Alps, Switzerland. *Eclogae Geologicae Helvetiae* **97**, 265–278 (2004).
- Trautwein, B. *Detritus provenance and thermal history of the Rhenodanubian flysch zone: mosaic stones for the reconstruction of the geodynamic evolution of the Eastern Alps*. Ph.D. thesis, Institut und Museum für Geologie und Paläontologie der Universität Tübingen (2000).
- Tricart, P., van der Beek, P., Schwartz, S. & Labrin, E. Diachronous late-stage exhumation across the western Alpine arc: constraints from apatite fission-track thermochronology between the Pelvoux and Dora-Maira Massifs. *Journal of the Geological Society, London* **164**, 163–174 (2007).
- Valla, P. G., Shuster, D. & van der Beek, P. Significant increase in relief of the European Alps during mid-Pleistocene glaciations. *Nature Geoscience* **4**, 688–692 (2011).
- van der Beek, P., Valla, P. G. *et al.* Inversion of thermochronological age-elevation profiles to extract independent estimates of denudation and relief history—II: Application to the French Western Alps. *Earth and Planetary Science Letters* **296**, 9–22 (2010).
- Viola, G., Mancktelow, N. & Seward, D. Late Oligocene-Neogene evolution of Europe-Adria collision: New structural and geochronological evidence from

- the Giudicarie fault system (Italian Eastern Alps). *Tectonics* **20**, 999–1020 (2001).
- Viola, G., Mancktelow, N., Seward, D., Meier, A. & Martin, S. The Pejo fault system: An example of multiple tectonic activity in the Italian Eastern Alps. *Geological Society of America Bulletin* **115**, 515 (2003).
- Viola, G. *Kinematics and timing of the Periadriatic fault system in the Giudicarie region (central-Eastern Alps)*. Ph.D. thesis, no. 13590, ETH Zürich, Switzerland, 206 pp (2000).
- Wagner, G., Reimer, G. & Jäger, E. Cooling ages derived by apatite fission track, mica Rb-Sr and K-Ar dating: the uplift and cooling history of the Central Alps. *Mem. Ist. Geol. Min. Univ. Padova* **30**, 1–27 (1977).
- Wagner, G. A., Miller, D. S. & Jäger, E. Fission track ages on apatite of Bergell rocks from Central Alps and Bergell boulders in Oligocene sediments. *Earth and Planetary Science Letters* **45**, 355–360 (1979).
- Wagner, G. A. & Reimer, G. M. Fission track tectonics: the tectonic interpretation of fission track apatite ages. *Earth and Planetary Science Letters* **14**, 263–268 (1972).
- Weh, M. *Tektonische Entwicklung der penninischen Sediment-Decken in Graubünden (Prättigau bis Oberhalbstein)*. Ph.D. thesis, University of Basel, Switzerland, 230 pp (1998).
- Wölfler, A. *et al.* Late stage differential exhumation of crustal blocks in the central Eastern Alps: evidence from fission track and (U–Th)/He thermochronology. *Terra Nova* **20**, 378–384 (2008).
- Zattin, M., Stefani, C. & Martin, S. Detrital fission-track analysis and sedimentary petrofacies as keys of Alpine exhumation: The example of the Venetian Foreland (European Southern Alps, Italy). *Journal of sedimentary research* **73**, 1051 (2003).
- Zattin, M. *et al.* From middle jurassic heating to neogene cooling: The thermochronological evolution of the southern alps. *Tectonophysics* **414**, 191 – 202 (2006). TRANSALP - A Transect Through a Young Collisional Orogen.
